# Supplementary material for: cAMP-induced actin cytoskeleton remodelling inhibits MKL1-dependent expression of the chemotactic and pro-proliferative factor, CCN1
Source: PubMed Central journal article supplement (PMC4312355; doi:10.1016/j.yjmcc.2014.11.012), 2015-02
Supplement: mmc1.pdf [file mmc1.pdf]

Supplement Figure S1

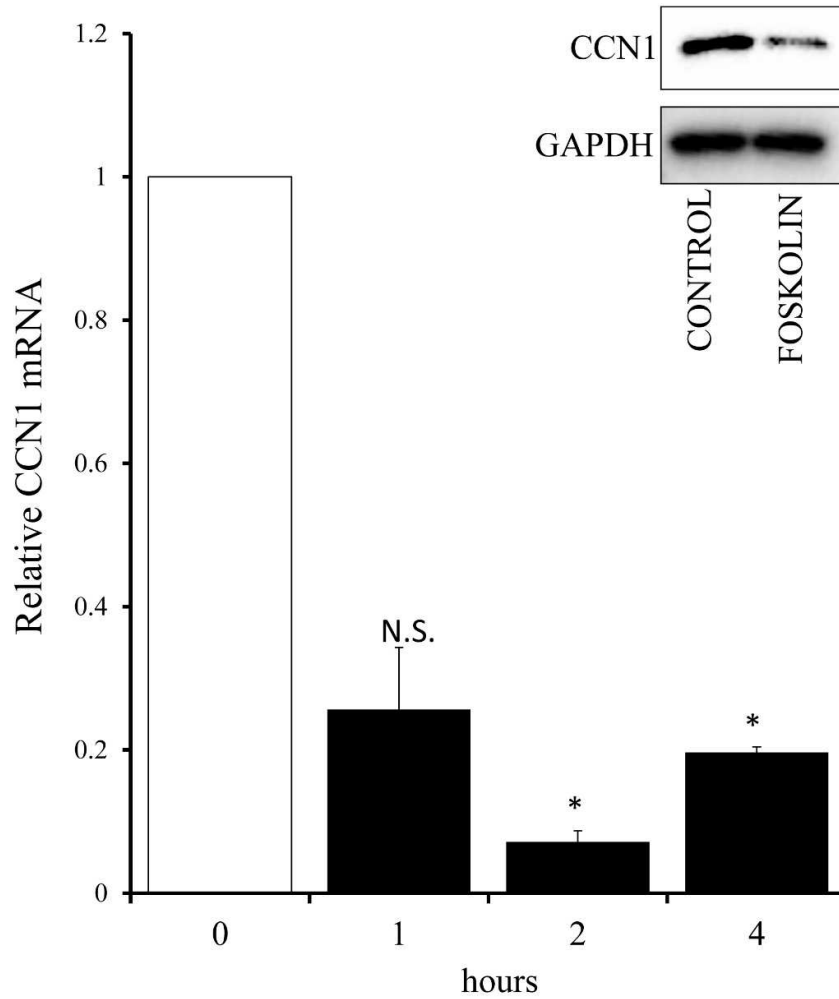

**Supplement Figure S1: Effect of forskolin on CCN1 mRNA and protein levels in human aortic VSMC.**

CCN1 mRNA levels in Human aortic VSMC stimulated with 10  $\mu$ M forskolin for the indicated times. CCN1 protein was analysed by western blotting after 8 hours stimulation with 10  $\mu$ M forskolin (inset).

Figure S2

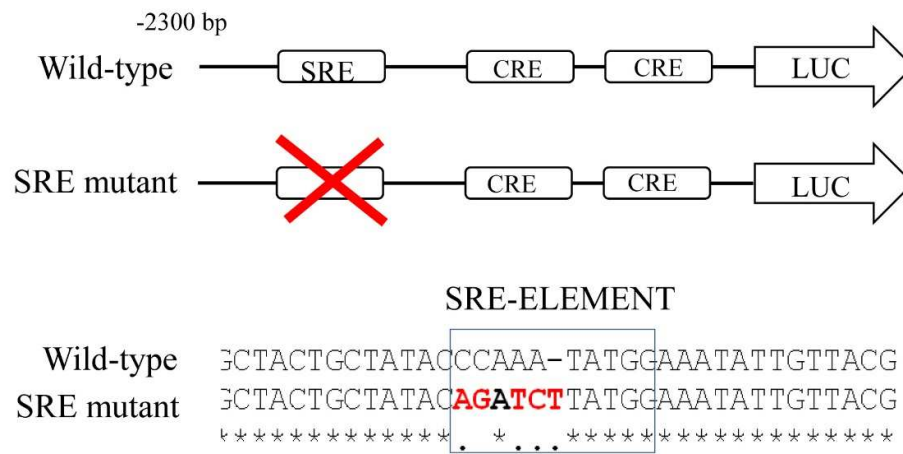

**Supplement Figure S2**

**Schematic representation of the wild-type and SRE mutated CCN1 promoter luciferase reporter vector.**

Figure S3

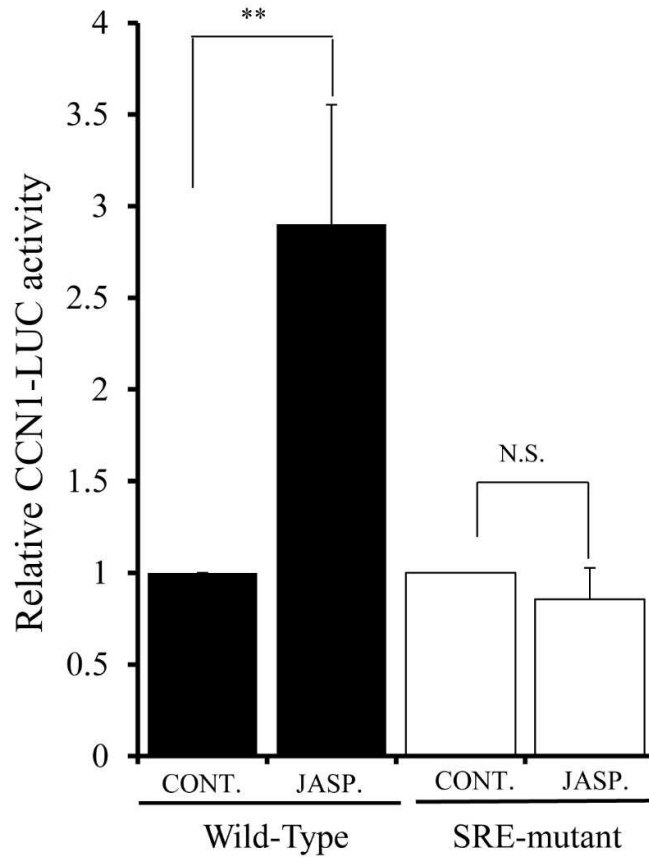

**Supplement Figure S3**

Activity of wild type and SRE-mutated CCN1 promoter after a 2 hour stimulation with 0.5  $\mu$ M jasplakinolide.

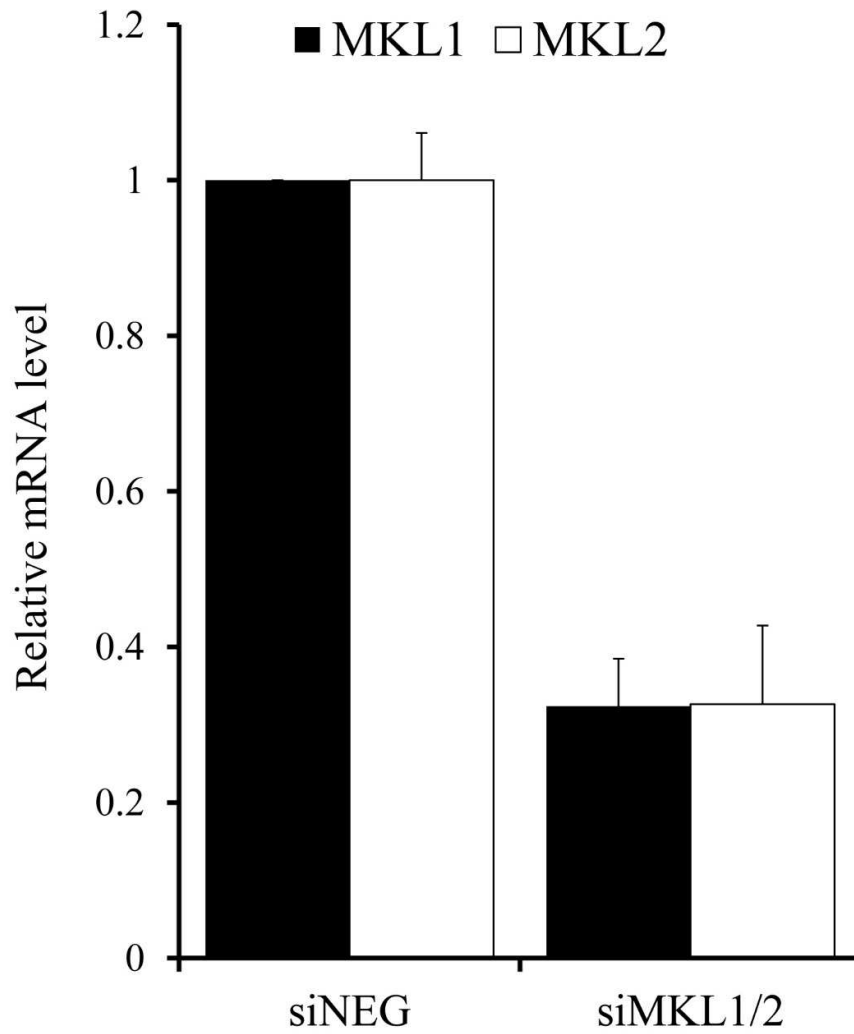

**Supplement Figure S4**

MKL1 and MKL2 mRNA levels in cells transfected with siRNA targeting MKL1 and MKL2.
